# Supplementary material
Source: PubMed Central journal article supplement (PMC2841526)

**Supplemental Figure 1. Amino acid sequences of constructs.**

**Supplemental Figure 2. Activation loop phosphorylation of c-Src and mutants.**

Experiments were carried out as described in the legend to Fig. 2A. Results shown in Fig. 2A are at the top, and results from two additional independent experiments are shown.

**Supplemental Figure 3. Cas phosphorylation by c-Src and mutants.** Experiments were carried out as described in the legend to Fig. 5A. Results shown in Fig. 5A are at the top, and results from two additional independent experiments are shown.

**Supplemental Figure 4. Sam68 phosphorylation by c-Src and mutants.** Experiments were carried out as described in the legend to Fig. 7. Results shown in Fig. 7 are at the top, and results from two additional independent experiments are shown.

**Supplemental Figure 1**  
**Amino acid sequences of wild-type and mutant forms of Src**

**WT**

MDYKDHDGDYKDHDIDYKDDDDDKLAAAMGSNKS KPKDASQRRRSLEPSE  
NVHGAGGAFPASQTPSKPASADGHRGPSAAFVPPAAEPKLFGGFNSSDTV  
TSPQRAGALAGNSGGVTTFFVALYDYESRTETDLSFKKGERLQIVNNT  
EGDWLAHSLSTGQTGYIPSNYVAPSDSGQDLWYFGKITRRESERLLLNAEN  
PRGTFLVRESETTKGAYCLSVSDFDNAKGLNVKHYKIRKLDSGGFYITSRT  
QFNSLQQLVAYYSKHADGLCHRLTTVCGISPTSKPQTQGLAKDAWEIPRE  
SLRLEVKLGQGC FGEVWMGTWNGTTRVAIKTLKPGTMSPEAFLQEAQVMK  
KLRHEKLVQLYAVVSEEPYIVTEYMNKGSLLDFLKGETGKYLRLPQLVD  
MSAQIASGMAYVERMNYVHRDLRAANILVGENLVCKVADFGLARLIEDNE  
YTARQGAKFPIKWTAPEAALYGRFTIKSDVWSFGILLTELTTKGRVPYPG  
MVNREVLDQVERGYRMP CPPECPESLHDLMCQCWRKEPEERPTFEYLQAF  
LEDYFTSTEPQYQPGENL

**U23C**

MDYKDHDGDYKDHDIDYKDDDDDKLAAAMGSNKS KPKDASQRRRSLEPSE  
NVHGAGGAFPASQTPSKPASADGHRGPSAAFVPPAAEPKLFGGFNSSDTV  
TSPQRAGALAGNSWYFGKITRRESERLLLNAENPRGTFLVRESETTKGAY  
CLSVSDFDNAKGLNVKHYKIRKLDSGGFYITSRTQFNSLQQLVAYYSKHA  
DGLCHRLTTVCGQDLGGVTTFFVALYDYESRTETDLSFKKGERLQIVNTE  
GDWWLAHSLSTGQTGYIPSNYVAPSDSGISPTSKPQTQGLAKDAWEIPRE  
SLRLEVKLGQGC FGEVWMGTWNGTTRVAIKTLKPGTMSPEAFLQEAQVMK  
KLRHEKLVQLYAVVSEEPYIVTEYMNKGSLLDFLKGETGKYLRLPQLVD  
MSAQIASGMAYVERMNYVHRDLRAANILVGENLVCKVADFGLARLIEDNE  
YTARQGAKFPIKWTAPEAALYGRFTIKSDVWSFGILLTELTTKGRVPYPG  
MVNREVLDQVERGYRMP CPPECPESLHDLMCQCWRKEPEERPTFEYLQAF  
LEDYFTSTEPQYQPGENL

**UC32**

MDYKDHDGDYKDHDIDYKDDDDDKLAAAMGSNKS KPKDASQRRRSLEPSE  
NVHGAGGAFPASQTPSKPASADGHRGPSAAFVPPAAEPKLFGGFNSSDTV  
TSPQRAGALAGNSPTSKPQTQGLAKDAWEIPRESLRLEVKLGQGC FGEVW  
MGTWNGTTRVAIKTLKPGTMSPEAFLQEAQVMK KLRHEKLVQLYAVVSEE  
PIYIVTEYMNKGSLLDFLKGETGKYLRLPQLV DMSAQIASGMAYVERMNY  
VHRDLRAANILVGENLVCKVADFGLARLIEDNEY TARQGAKFPIKWTAPE  
AALYGRFTIKSDVWSFGILLTELTTKGRVPYPGMVNREVLDQVERGYRMP  
CPPECPESLHDLMCQCWRKEPEERPTFEYLQAF LEDYFRSGGVTTFFVALY  
DYESRTETDLSFKKGERLQIVNNT  
EGDWLAHSLSTGQTGYIPSNYVAPSDSIQAEWYFGKITRRESERLLLNAENPRGTFLVRESETTKGAYCLSVSDFDNAKGLNVKHYKIRKLDSGGFYITSRTQFNSLQQLVAYYSKHADGLCHRLTTVCSR PQYQPGENL

### 3U2C

MDYKDHDGDYKDHDIDYKDDDDDKLAAAGGVTTFFVALYDYESRTETDLSF  
KKGERLQIVNNTEGDWWLAHSLSTGQTGYIPSNYVAPSDSGGNSMGSNKS  
KPKDASQRRRSLEPSENVHGAGGAFPASQTPSKPASADGHRGPSAAFVPP  
AAEPKLFGGFNSSDVTSPQRAGALAQDLWYFGKITRRESERLLLNAENP  
RGTFLVRESETTKGAYCLSVSDFDNAKGLNVKHYKIRKLDSGGFYITSRT  
QFNSLQQLVAYYSKHADGLCHRLTTVCGISPTSKPQTQGLAKDAWEIPRE  
SLRLEVKLGQGCFCGEVWMGTWNGTTRVAIKTLKPGTMSPEAFLQEAQVMK  
KLRHEKLVQLYAVVSEPIYIVTEYMNKGSLLDFLKGETGKYLRPLQLVD  
MSAQIASGMAYVERMNYVHRDLRAANILVGENLVCKVADFGLARLIEDNE  
YTARQGAKFPIKWTAPEAALYGRFTIKSDVWSFGILLTELTTKGRVPYPG  
MVNREVLQVERGYRMPCPPECPELHDLMCQCWRKEPEERPTFEYLQAF  
LEDYFTSTEPQYQGENL

### 32UC

MDYKDHDGDYKDHDIDYKDDDDDKLAAAGGVTTFFVALYDYESRTETDLSF  
KKGERLQIVNNTEGDWWLAHSLSTGQTGYIPSNYVAPSDSGGNSWYFGKI  
TRRESERLLLNAENPRGTFLVRESETTKGAYCLSVSDFDNAKGLNVKHYK  
IRKLDSGGFYITSRTQFNSLQQLVAYYSKHADGLCHRLTTVCGQDLMGSN  
KSKPKDASQRRRSLEPSENVHGAGGAFPASQTPSKPASADGHRGPSAAFV  
PPAAEPKLFGGFNSSDVTSPQRAGALAGISPTSKPQTQGLAKDAWEIPR  
ESLRLEVKLGQGCFCGEVWMGTWNGTTRVAIKTLKPGTMSPEAFLQEAQVM  
KKLRHEKLVQLYAVVSEPIYIVTEYMNKGSLLDFLKGETGKYLRPLQLV  
DMSAQIASGMAYVERMNYVHRDLRAANILVGENLVCKVADFGLARLIEDN  
EYTARQGAKFPIKWTAPEAALYGRFTIKSDVWSFGILLTELTTKGRVPYP  
GMVNREVLQVERGYRMPCPPECPELHDLMCQCWRKEPEERPTFEYLQA  
FLEDYFTSTEPQYQGENL\*GS

### 32CU

MDYKDHDGDYKDHDIDYKDDDDDKLAAAGGVTTFFVALYDYESRTETDLSF  
KKGERLQIVNNTEGDWWLAHSLSTGQTGYIPSNYVAPSDSGGNSWYFGKI  
TRRESERLLLNAENPRGTFLVRESETTKGAYCLSVSDFDNAKGLNVKHYK  
IRKLDSGGFYITSRTQFNSLQQLVAYYSKHADGLCHRLTTVCGQDLPTSK  
PQTQGLAKDAWEIPRESLRLEVKLGQGCFCGEVWMGTWNGTTRVAIKTLK  
GTMSPEAFLQEAQVMKLRHEKLVQLYAVVSEPIYIVTEYMNKGSLLDF  
LKGETGKYLRPLQLVDMSAQIASGMAYVERMNYVHRDLRAANILVGENLV  
CKVADFGLARLIEDNEYTARQGAKFPIKWTAPEAALYGRFTIKSDVWSFG  
ILLTELTTKGRVPYPMVNREVLQVERGYRMPCPPECPELHDLMCQCW  
RKEPEERPTFEYLQAFLEDYFTSTEPQYQGENLEGISMGSNKS  
KPKDASQRRRSLEPSENVHGAGGAFPASQTPSKPASADGHRGPSAAFVPPAAEPK  
LFGFNSSDVTSPQRAGALAGS

### **2UC3**

MDYKDHDGDYKDHDIDYKDDDDDKLAAA WYFGKITRRESERLLLNAENPR  
GTFLVRESETTKGAYCLSVSDFDNAKGLNVKHYKIRKLDSGGFYITSRTQ  
FNSLQQLVAYYSKHADGLCHRLTTVCGNSMGSNKS KPKDASQRRRSLEPS  
ENVHGAGGAFPASQTPSKPASADGHRGPSAAFVPPAAEPKLFGGFNSSDT  
VTSPQRAGALAQDLPTSKPQTQGLAKDAWEIPRESLRLEVKLGQGCFGEV  
WMGTWNGTTRVAIKTLKPGTMSPEAFLQEAQVMKKLRHEKLVQLYAVVSE  
EPIYIVTEYMNKGSLLDFLKGETGKYLRPLQVDMSAQIASGMAYVERMN  
YVHRDLRAANILVGENLVCKVADFGLARLIEDNEY TARQGAKFPIKWTAP  
EAALYGRFTIKSDVWSFGILLTELTTKGRVPYPGMVNREVL DQVERGYRM  
PCPECPESLHDLMCQCWRKEPEERPTFEYLQAFLEDYFTSTEPQYQPGE  
NLEGISGGVTTFFVALYDYESRTETDLSFKKGERLQIVNNT EGDWWLAHSL  
STGQTGYIPSNYVAPSDSGS

### **3UC2**

MDYKDHDGDYKDHDIDYKDDDDDKLAAAGGVTTFFVALYDYESRTETDLSF  
KKGERLQIVNNT EGDWWLAHSLSTGQTGYIPSNYVAPSDSGGNSMGSNKS  
KPKDASQRRRSLEPSENVHGAGGAFPASQTPSKPASADGHRGPSAAFVPP  
AAEPKLFGGFNSSDTVTSPQRAGALAQDLPTSKPQTQGLAKDAWEIPRES  
LRLEVKLGQGCFGEVWMGTWNGTTRVAIKTLKPGTMSPEAFLQEAQVMKK  
LRHEKLVQLYAVVSE EPIYIVTEYMNKGSLLDFLKGETGKYLRPLQVDM  
SAQIASGMAYVERMNYVHRDLRAANILVGENLVCKVADFGLARLIEDNEY  
TARQGAKFPIKWTAPEAALYGRFTIKSDVWSFGILLTELTTKGRVPYPGM  
VNREVL DQVERGYRMPCPECPESLHDLMCQCWRKEPEERPTFEYLQAF  
EDYFTSTEPQYQPGENLEGISWYFGKITRRESERLLLNAENPRGTFLVRE  
SETTKGAYCLSVSDFDNAKGLNVKHYKIRKLDSGGFYITSRTQFNSLQQL  
VAYYSKHADGLCHRLTTVCGS

### **RL/WA**

MDYKDHDGDYKDHDIDYKDDDDDKLAAAMGSNKS KPKDASQRRRSLEPSE  
NVHGAGGAFPASQTPSKPASADGHRGPSAAFVPPAAEPKLFGGFNSSDTV  
TSPQRAGALAGNSGGVTTFFVALYDYESRTETDLSFKKGERLQIVNNT EGD  
AWLAHSLSTGQTGYIPSNYVAPSDSGQDLWYFGKITRRESERLLLNAENP  
RGTFLVLESETTKGAYCLSVSDFDNAKGLNVKHYKIRKLDSGGFYITSRT  
QFNSLQQLVAYYSKHADGLCHRLTTVCGISPTSKPQTQGLAKDAWEIPRE  
SLRLEVKLGQGCFGEVWMGTWNGTTRVAIKTLKPGTMSPEAFLQEAQVMK  
KLRHEKLVQLYAVVSE EPIYIVTEYMNKGSLLDFLKGETGKYLRPLQVD  
MSAQIASGMAYVERMNYVHRDLRAANILVGENLVCKVADFGLARLIEDNEY  
YTARQGAKFPIKWTAPEAALYGRFTIKSDVWSFGILLTELTTKGRVPYPG  
MVNREVL DQVERGYRMPCPECPESLHDLMCQCWRKEPEERPTFEYLQAF  
LEDYFTSTEPQYQPGENL

## Catalytic domain

MDYKDHDGDYKDHDIDYKDDDDKLAANSSIDLISPTSKPQTQGLAKDAW  
EIPRESLRLEVKLGQGCFCGEVWMGTWNGTTRVAIKTLKPGTMSPEAFLQE  
AQVMKKLRHEKLVQLYAVVSEEPYIVTEYMNKGSLDFLKGETGKYLRL  
PQLVDMSAQIASGMAYVERMNYVHRDLRAANILVGENLVCKVADDFGLARL  
IEDNEYTARQGAKFPIKWTAPEAALYGRFTIKSDVWSFGILLTELTTKGR  
VPYPGMVNREVLDQVERGYRMPCPPECPESLHDLMCQCWRKEPEERPTFE  
YLQAFLEDYFTSTEPQYQGENL

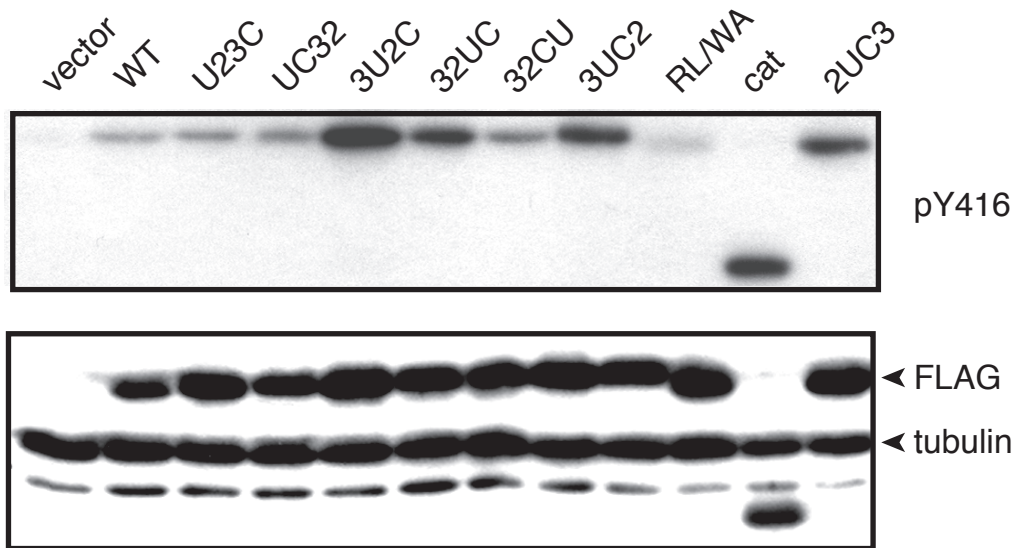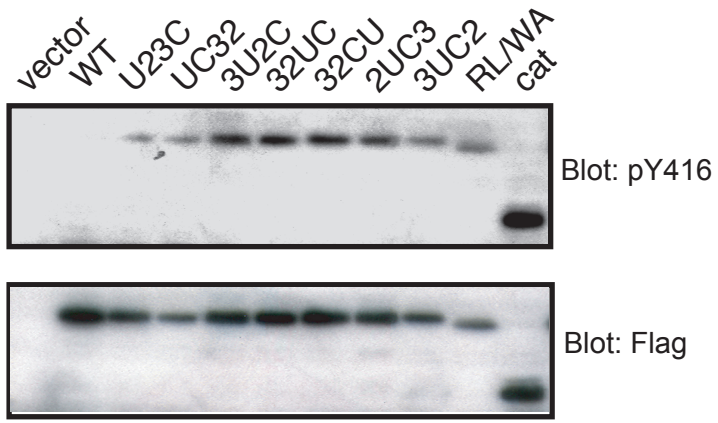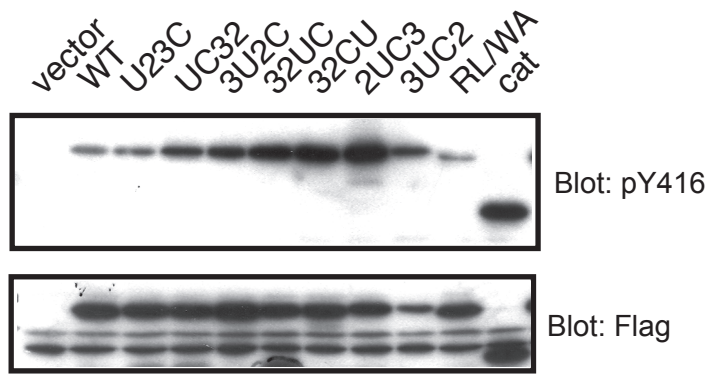

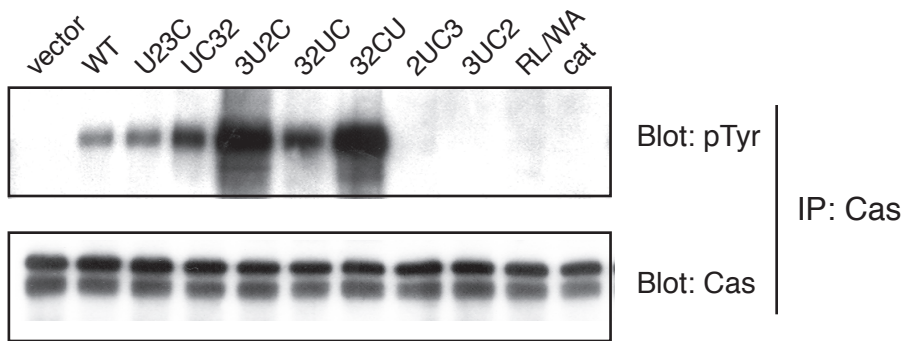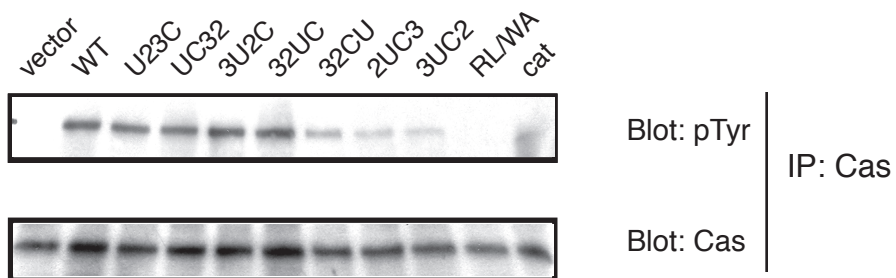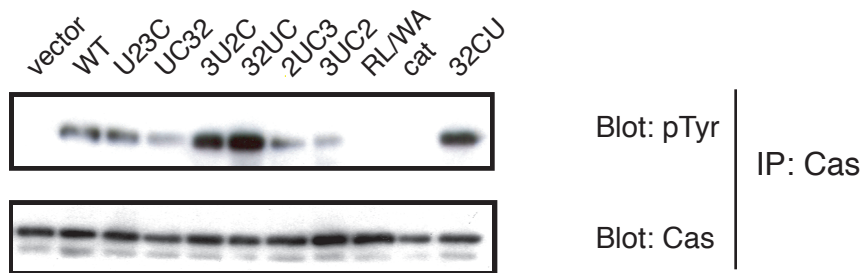

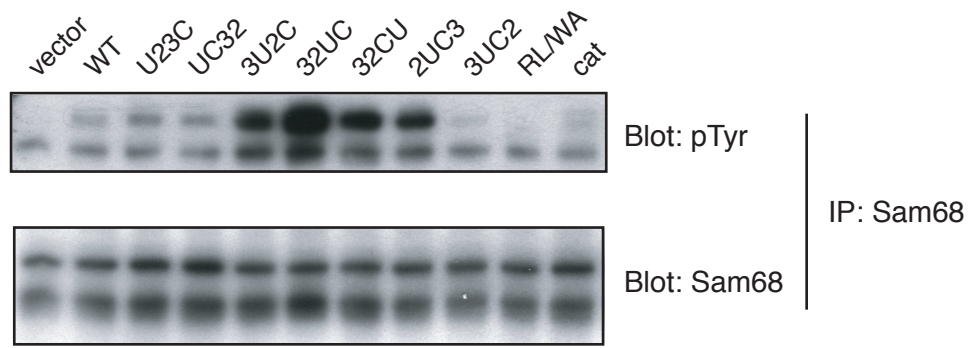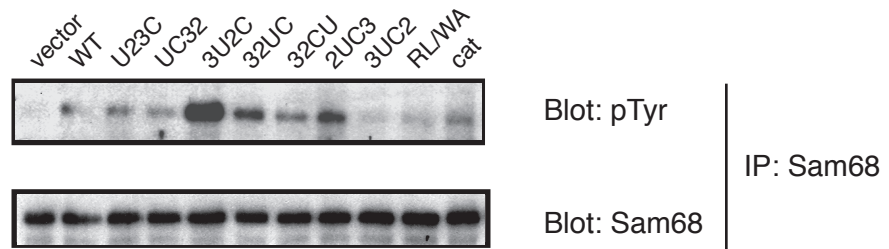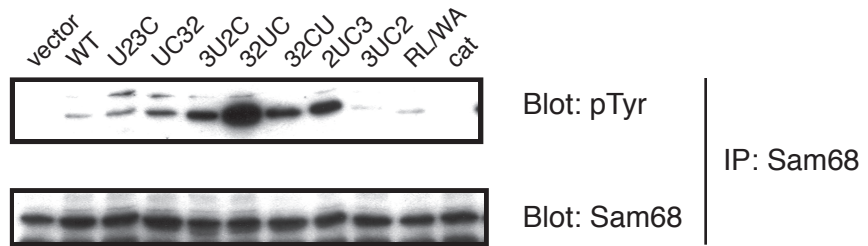

Supplement: NIHMS184477-supplement-supplementary_data.pdf [file NIHMS184477-supplement-supplementary_data.pdf]
